1 **Evaluation of longitudinal time-lapsed *in vivo* micro-CT for monitoring fracture healing in**  
2 **mouse femur defect models**

3 Esther Wehrle<sup>1</sup>, Duncan C Betts<sup>1</sup>, Gisela A Kuhn<sup>1</sup>, Ariane C Scheuren<sup>1</sup>, Sandra Hofmann<sup>1,2</sup>,  
4 Ralph Müller<sup>1\*</sup>

5 <sup>1</sup> Institute for Biomechanics, ETH Zurich, Zurich, Switzerland, <sup>2</sup> Department of Biomedical  
6 Engineering and Institute for Complex Molecular Systems, Eindhoven University of  
7 Technology, The Netherlands.

8

9 **Corresponding author:**

10 Ralph Müller, PhD

11 Institute for Biomechanics

12 ETH Zurich

13 Leopold-Ruzicka-Weg 4

14 8093 Zurich, Switzerland

15 Email: ram@ethz.ch

16

17

18

19

20 **Abstract**

21 Longitudinal *in vivo* micro-computed tomography (micro-CT) is of interest to non-invasively  
22 capture the healing process of individual animals in preclinical fracture healing studies.  
23 However, as adverse imaging effects associated with anesthesia, handling, and radiation  
24 have been reported in some cases, this study assessed imaging-associated effects on  
25 fracture healing in a mouse femur defect model. A scan group received weekly micro-CT  
26 measurements (week 0-6), whereas controls were only scanned post-operatively and at  
27 week 5 and 6. Registration of consecutive scans enabled assessment of bone turnover with  
28 distinct characteristics of the different healing phases. Weekly micro-CT application did not  
29 significantly change any of the assessed callus parameters in defect and periosteal volumes.  
30 This was supported by histology showing only small amounts of cartilage residuals in both  
31 groups, indicating progression towards the end of the healing period. Also,  
32 immunohistochemical staining of Sclerostin, previously associated with mediating adverse  
33 radiation effects on bone, did not reveal differences between groups.

34 The established longitudinal *in vivo* micro-CT-based approach allows monitoring of healing  
35 phases in mouse femur defect models without significant effects of anesthesia, handling and  
36 radiation on callus properties. Therefore, this study supports application of longitudinal *in*  
37 *vivo* micro-CT for healing-phase-specific monitoring of fracture repair in mice.

38

39

40

## 41 **Introduction**

42 Adequate monitoring and characterization of the healing process is important in preclinical  
43 fracture healing studies. One recent approach to non-invasively capture the formation and  
44 remodeling of the osseous fracture callus is the repeated application of *in vivo* micro-  
45 computed tomography (micro-CT) <sup>1-3</sup>. This approach allows three-dimensional assessment of  
46 callus structures and by registering consecutive scans, dynamic parameters such as bone  
47 formation and resorption can be evaluated <sup>4,5</sup>. As each animal can be followed individually  
48 throughout the healing process with low variance in the assessed parameters, animal  
49 numbers can be reduced compared to well-established cross-sectional studies with endpoint  
50 micro-CT and two-dimensional histological callus evaluation.

51 In non-fractured bone, longitudinal time-lapsed *in vivo* micro-CT has been increasingly used  
52 to monitor changes in bone properties associated with different diseases and external  
53 factors, e.g. estrogen-deficiency <sup>6-8</sup>, mechanical-(un)loading <sup>9-11</sup>, and drug application <sup>12</sup>.  
54 However, several studies indicate that anesthesia, cumulative radiation dosage and stress  
55 due to the required handling for the CT measurements may have effects on animal well-  
56 being and bone properties <sup>7,13-16</sup>. According to the EU Directive 2010/63, the severity of  
57 repeated isoflurane anesthesia can be categorized as mild, although repeated anesthesia  
58 was considered worse than a single session with sex-dependent differences in perceiving the  
59 severity of a procedure <sup>13</sup>. Specifically, female mice were shown to be more susceptible to  
60 anesthesia-induced effects on well-being compared to male mice. Nevertheless, in both  
61 sexes repeated isoflurane anesthesia caused only short-term mild distress and impairment  
62 of well-being, mainly in the immediate post-anesthetic period. Radiation has also been  
63 shown to have dosage-dependent effects on bone cells *in vivo* and *in vitro* (12): Whereas

64 high dose x-ray radiation (2.5-8Gy) was associated with reduced osteoblast and osteoclast  
65 proliferation<sup>9,17-19</sup>, lower doses (<2Gy) had a stimulatory effect on osteoclasts. Some studies  
66 reported radiation-associated effects on structural bone parameters, whereas other studies  
67 did not see any changes<sup>7,20</sup>. These findings indicate the importance of study-specific  
68 adaptation of micro-CT protocols, and to protect animals scanning times and radiation  
69 settings should be minimized.

70 Recently, several fracture healing studies have applied longitudinal *in vivo* micro-CT to  
71 monitor callus formation<sup>2,3,21-23</sup>. However, as adverse effects of longitudinal imaging on the  
72 development of bone properties have been reported in the literature in some cases during  
73 normal bone remodeling, there is a need to also assess imaging-associated impact on the  
74 callus formation during the highly metabolically active process of fracture healing.

75 Therefore, the objectives of this study were to establish an *in vivo* micro-CT based approach  
76 for longitudinal monitoring of fracture healing in a mouse femur defect model and to assess  
77 the combined effect of radiation, anesthesia and handling associated with weekly time-  
78 lapsed micro-CT measurements on callus properties during the remodeling phase of fracture  
79 healing.

80

## 81 **Results**

### 82 **General physical observation**

83 All mice recovered rapidly from surgery. During the healing period, in both groups, the  
84 animals' body weight did not significantly change compared to pre-operative values without  
85 significant differences between the two groups (see Supplementary Fig. S1 online). Social

86 interaction between mice and nesting behaviour did not differ from pre-surgical  
87 observations and was similar for animals of the scan and control groups.

88

### 89 **Volumes of interest (VOI) for evaluation by time-lapsed *in vivo* micro-CT**

90 One animal from the scan group could not be included in the analysis due to failure in VOI  
91 generation caused by too little cortical bone being present in the field of view. The four  
92 different VOIs (depicted in Fig. 1) encompassed the following volume for the control (n=8)  
93 and scan group (n=10):  $2.51 \pm 0.34 \text{mm}^3$  vs.  $2.60 \pm 0.34 \text{mm}^3$  for the defect center (DC),  
94  $17.26 \pm 2.21 \text{mm}^3$  vs.  $18.73 \pm 4.64 \text{mm}^3$  for the defect periphery (DP),  $1.86 \pm 0.48 \text{mm}^3$  vs.  
95  $1.73 \pm 0.45 \text{mm}^3$  for the cortical fragments (FC),  $14.47 \pm 3.30 \text{mm}^3$  vs.  $13.10 \pm 2.66 \text{mm}^3$  for the  
96 fragment periphery (FP). The total volume (TOT) between the inner pins of the fixator was  
97  $36.10 \pm 2.81 \text{mm}^3$  for the control and  $36.15 \pm 3.74 \text{mm}^3$  for the scan group. No significant  
98 differences in volume were detected in any of the VOIs between groups.

99

### 100 **Longitudinal monitoring of fracture healing by time-lapsed *in vivo* micro-CT**

101 In the scan group (n=10), the repeated micro-CT scans (1x/week, Fig. 2) covered the period  
102 from the day of the defect surgery (d0) until post-operative week 6 with distinct callus  
103 characteristics indicative of the different healing phases (inflammation, repair, remodeling).  
104 From week 0-1 to week 1-2 a significant 5.7x increase in bone formation was detected (Fig.  
105 3a) in the total VOI (TOT=DC+DF+FC+FP,  $p < 0.0001$ ; Fig. 1), indicating progression from the  
106 inflammation to the reparative phase. This led to a significant gain in bone volume by week 2  
107 ( $\text{BV}/\text{TV}_{\text{week}2}$ :  $39 \pm 7\%$  vs.  $\text{BV}/\text{TV}_{\text{week}0}$ :  $25 \pm 3\%$ ,  $p = 0.0134$ ; Fig. 3b). As bone formation triggers the  
108 onset of bone resorption, a significant 2.8x increase in resorptive activities was seen from

109 week 1-2 to week 2-3 ( $p=0.0020$ ), indicating the progression to the remodeling phase. Two  
110 weeks after surgery the highly mineralized bone fraction in the TOT VOI was significantly  
111 lower compared to the post-operative measurement ( $BV_{645}/BV_{395}$  in week 2:  $59\pm 5\%$  vs.  
112  $BV_{645}/BV_{395}$  in week 0:  $84\pm 1\%$ ,  $p<0.0001$ ), indicating formation of mineralized callus of low  
113 density. From postoperative week 2 onwards, the highly mineralized bone fraction in the  
114 TOT VOI gradually increased in all subsequent weeks of the healing period reaching  
115 statistical significance by week 5 ( $BV_{645}/BV_{395}$  in week 2:  $59\pm 5\%$  vs.  $BV_{645}/BV_{395}$  in week 5:  
116  $79\pm 3\%$ ,  $p=0.0134$ ; Fig. 3c).

117  
118 In order to better capture the regions where bone is mainly formed and resorbed, we  
119 evaluated the different VOIs separately (Table 1): In the early postoperative phase from  
120 week 0-1 to week 1-2 a strong onset of bone formation was seen in the DC and FP sub-  
121 volumes, leading to significant 11.8x and 3.4x gain in mineralized tissue from week 0 to week  
122 2 for DC ( $p=0.0090$ ) and FP ( $p=0.0091$ ), respectively. This indicates that both intra-cortical as  
123 well as periosteal callus formation takes place in this femur defect model. In both VOIs bone  
124 formation triggered the initiation of bone resorption from week 2-3. In detail, there was a  
125 significant 6.2x and 2.9x increase in bone resorption from week 1-2 to week 2-3 in the DC  
126 ( $p=0.0040$ ) and the FP VOI ( $p=0.0079$ ), respectively. Compared to the DC and FP VOIs, the  
127 initiation of bone formation was much less pronounced in the DP sub-volume with less  
128 deposition of mineralized tissue leading to only little peripheral callus formation in this VOI  
129 (week 2-6) and subsequently low bone resorption activities from week 2-3 to week 5-6. In all  
130 three regions (DC, DP, FP) the fraction of highly mineralized tissue considerably increased  
131 from week 2 to week 5 (+192%, +774%, +227%), indicating callus maturation. In this femur

132 defect model, callus formation and remodeling mainly took place in the defect region (DC)  
133 with only little peripheral callus formation and remodeling (DP). Looking at the cortical  
134 fragments (FC), a significant 3.2x increase in resorptive activities was detected in week 1-2  
135 compared to week 0-1 ( $p=0.0421$ ), whereas no significant weekly change in bone formation  
136 activities was seen in this region throughout the assessed healing period. This resulted in a  
137 significant 24% reduction in bone volume from week 0 to week 4 ( $p=0.0091$ ). The fraction of  
138 highly mineralized bone also gradually decreased in the remaining osseous tissue reaching  
139 statistical significance by week 3 ( $BV_{645}/BV_{395}$  in week 3 reduced by 9% compared to week 0,  
140  $p=0.0027$ ).

141

#### 142 **Influence of the longitudinal *in vivo* micro-CT protocol on callus properties**

143 To assess the combined effects of radiation, anesthesia and handling associated with weekly  
144 micro-CT measurements (week 0 - week 6) on callus properties, callus parameters of the  
145 scan group were compared to control animals that were scanned only directly post-  
146 operatively (d0) and after 5 and 6 weeks (Fig. 4).

147

148 Post-operatively (d0), no significant group differences in bone volume (BV/TV) were found in  
149 any of the VOIs:  $1.82\pm 0.39\%$  (control) vs.  $1.47\pm 0.15\%$  (scan) in DC,  $0.16\pm 0.12\%$  (control) vs.  
150  $0.13\pm 0.06\%$  (scan) in DP,  $56.82\pm 2.31\%$  (control) vs.  $57.14\pm 6.99\%$  (scan) in FC,  $4.66\pm 0.30\%$   
151 (control) vs.  $4.74\pm 0.76\%$  (scan) in FP. Likewise, no group differences in bone volume were  
152 seen in the total volume (TOT;  $26.92\pm 4.69\%$  in controls and  $24.90\pm 2.88\%$  in the scan group).

153

154 During the remodeling phase (post-operative weeks 5-6), no significant difference in bone  
155 turnover was seen in the total volume (TOT) between the inner pins of the fixator (BFR:  
156  $0.76\pm 0.23\%$  in controls,  $0.64\pm 0.15\%$  in scan group; BRR:  $0.82\pm 0.25\%$  in controls,  $0.78\pm 0.26\%$   
157 in scan group). Also, bone volume did not significantly change due to the applied micro-CT  
158 protocol with a similar fraction of highly mineralized tissue after 5 weeks ( $BV_{645}/BV_{395}$ :  $79\pm 3\%$   
159 in controls,  $79\pm 3\%$  in scan group) and 6 weeks ( $BV_{645}/BV_{395}$ :  $81\pm 3\%$  in controls,  $82\pm 4\%$  in  
160 scan group).

161

162 Regarding the four sub-volumes (Table 2), the applied micro-CT protocol did not significantly  
163 affect bone formation and resorption activities in the callus VOIs (DC, DP and FP) from week  
164 5-6 with similar bone volume observed in week 5 and 6 for controls and scanned animals. In  
165 both groups, bone volume remained stable from week 5 to week 6, whereas the density of  
166 the mineralized tissue increased during the same period (DC, DP, FP). Looking at the  
167 adjacent cortical fragments (FC) also no significant differences were detected in any of the  
168 assessed parameters between the control group and the scan group. Similarly to the callus  
169 VOIs, bone volume also remained stable in this region from week 5 to week 6. However, in  
170 contrast to the callus VOIs, the density of the mineralized tissue in the cortical VOI FC did not  
171 change from week 5 to week 6. In week 6, the FC VOI comprised 33% and 35% of the  
172 osseous tissue in the total VOI (TOT) for the control and scan group, respectively. In the DC  
173 VOI, 37% (control group) and 36% (scan group) of the total bone volume were seen. Less  
174 osseous tissue was detected in the two peripheral VOIs, 11% (control group) and 12% (scan  
175 group) in the DP and 19% (control group) and 17% (scan group) in the FP VOI.

176



177 As group comparisons were only performed from week 5-6, we particularly focused on the  
178 defect VOIs (DC+DP) which are most important for evaluating later healing time points  
179 during the remodeling phase of fracture healing. No significant differences in bone turnover,  
180 bone volume and mineralization were seen between the scan and control group. In addition,  
181 according to the standard clinical evaluation of X-rays, the number of bridged cortices per  
182 callus was evaluated in two perpendicular planes and animals with  $\geq 3$  bridged cortices were  
183 categorized as healed. By week 5, cortical bridging occurred in 75% of the control animals  
184 and 64% of the scanned animals (Table 3). However, non-unions only occurred in defects of  
185  $\geq 1.5$ mm length. Taking into account only these defects ( $\geq 1.5$ mm length), both groups had a  
186 non-union rate of 67% indicating no significant effect of the chosen micro-CT protocol on  
187 clinical fracture healing outcome.

188

### 189 **Histology**

190 As shown by Safranin-O staining six weeks after osteotomy no cartilage residuals were  
191 present in the defect region in the bridged defects indicating normal progression of the  
192 healing process in the final remodeling stage. In the non-union defects, only small areas of  
193 cartilage were seen in the defect region. No differences were seen by visual inspection  
194 between animals from the scan and control group (Fig. 5).

195

196 As radiation-mediated decreased bone formation by osteoblasts has previously been  
197 associated with the inhibition of osteoanabolic Wnt-signaling<sup>24</sup>, we assessed Sclerostin  
198 expression in the defect region by immunohistochemistry. Visual inspection did not reveal

199 any differences in staining intensity and amount of Sclerostin between the scan and control  
200 group (Fig. 5).

201

## 202 **Discussion**

203 In this study, longitudinal *in vivo* micro-CT was applied for monitoring the process of fracture  
204 healing in mice. In addition, the combined effect of radiation, anesthesia and handling  
205 associated with the established imaging approach on callus parameters was assessed. Until  
206 now, preclinical fracture healing studies predominantly have a cross-sectional study design  
207 with end-point callus evaluation in sub-groups of animals at different time points during the  
208 healing period. Only recently, several studies in murine diaphyseal femur defect models  
209 stabilized by external fixation <sup>2,3,21,22</sup> or intramedullary nails <sup>23</sup>, have applied longitudinal *in*  
210 *vivo* micro-CT to monitor the healing progression in each animal over time. These studies  
211 were able to consecutively assess callus parameters (e.g. callus volume and density) at  
212 specific time points during the healing process for up to 12 weeks <sup>2,3,21-23</sup>. By registering  
213 consecutive scans, we were now able to include dynamic parameters such as bone  
214 formation and resorption in our micro-CT based monitoring approach for fracture healing.  
215 This allows for characterization of the different healing phases seen by changes in formation  
216 and resorption in the osseous callus volume.

217 Specifically, we saw that the initiation of bone formation (maximum in week 2-3), indicative  
218 of the onset of the reparative phase, triggered bone resorption (maximum in week 3-4) with  
219 maximum osseous callus volumes in week 3. From week 4 to week 6, bone formation and  
220 resorption continuously decreased. Whereas these remodeling activities also led to a  
221 decrease in callus volume from week 4 to week 6, the density of the mineralized tissue in the

222 callus increased during the same period indicating advanced callus maturation. These  
223 observations were further supported by histology with no remaining cartilage in the defect  
224 region of unions and only a small amount of cartilage residuals in some non-unions. The  
225 findings are also in accordance with previous longitudinal studies of up to 4 weeks in mice  
226 <sup>2,3,22</sup> and 8 weeks in rats <sup>21</sup> mainly focusing on the inflammation and reparative phase.  
227 Similar to our study, the bone volume continuously increased during the 4/8 week healing  
228 period, although no remodeling to the original bone geometry was seen due to the shorter  
229 observation period. One study in ovariectomized rats with a 12-week post-operative  
230 monitoring period detected maximum osseous callus volumes by week 6, which diminished  
231 thereafter, whereas bone mineral density continuously increased until week 12, similar to  
232 our findings. This indicates that during the reparative phase first low-density bone is formed,  
233 which is then further mineralized during the remodeling phase of fracture healing. Looking  
234 at the functional fracture healing outcome, complete cortical bridging was seen in 64% of  
235 the animals, which is similar to other studies (60-62%) using similar femur defect models  
236 with relatively stiff external fixation (fixator stiffness measured in our study 24N/mm) in  
237 mice <sup>2,25</sup>. However, differences in defect sizes have to be considered: 0.7mm <sup>2</sup>, 1.19±0.25  
238 mm <sup>25</sup>, 1.47±0.16mm (this study). In contrast to the other studies, we saw the manifestation  
239 of non-unions only in defects ≥1.5mm. This might be partially due to the fact that in some  
240 studies the exact defect length might have differed from the reported value (saw diameter  
241 used for osteotomy) and that non-union formation was assessed irrespective of defect  
242 length. Overall, all longitudinal fracture healing studies using *in vivo* micro-CT were able to  
243 follow the healing progression in single animals, thereby reducing variance of outcome  
244 parameters compared to cross-sectional studies, also allowing for reduction of animals per

245 group considering the 3R principles of animal welfare <sup>26,27</sup>. However, when applying  
246 longitudinal *in vivo* micro-CT, the effect of repeated anesthesia, handling and radiation  
247 associated with the scans on the study's main outcome parameters and the general well-  
248 being of the animals have to be considered.

249 In this study, isoflurane was used as anesthetic agent for the *in vivo* micro-CT scans, which is  
250 the most commonly used inhalation anesthetic in longitudinal imaging studies with a fast on-  
251 and offset of anesthesia and low metabolism rate <sup>13</sup>. Despite its general use, isoflurane has  
252 been associated with several adverse effects, such as hepatic degenerative changes <sup>28</sup>,  
253 immunomodulation <sup>29</sup>, oxidative DNA damage <sup>30</sup> as well as alterations in expression profiles  
254 of oncogene and tumor suppressor genes in the bone marrow <sup>31</sup>, which might potentially  
255 also affect fracture healing and the general well-being of the animals. A recent study by  
256 Hohlbaum et al. (2017) <sup>13</sup>, which assessed the impact of repeated isoflurane anesthesia (6  
257 times for 45 min at an interval of 3–4 days) and the associated handling on the well-being of  
258 adult C57BL/6J mice, categorized the degree of distress as mild according to the EU  
259 Directive 2010/63 with only short-term impairment of well-being, mainly in the immediate  
260 post-anesthetic period. Therefore, isoflurane-based inhalation anesthesia and the associated  
261 handling of the animal is suggested for longitudinal studies with multiple anesthetic sessions  
262 per animal.

263 In this study, the applied micro-CT settings (55 kVp, 145  $\mu$ A, 350 ms integration time, 500  
264 projections per 180°, 21 mm field of view (FOV), scan duration ca. 15 min) were adapted  
265 from well-established protocols used for longitudinal monitoring of bone adaptation and  
266 implant integration in tail vertebrae in mice <sup>10,32</sup>. These settings are similar to protocols used  
267 in 2 of the 5 longitudinal fracture healing studies published so far <sup>3,21</sup>, while the 3 other

268 studies did not specify the CT settings <sup>2,22,23</sup>. The radiation dosage (CT dose index, CTDI)  
269 associated with each scan in the current study was previously estimated to be 0.67 Gy per  
270 scan <sup>32,33</sup>. A radiation control experiment using similar settings did not show detrimental  
271 effects of 5 weekly *in vivo* micro-CT scans on bone development in tail vertebrae of mice <sup>33</sup>.  
272 However, some studies in non-fractured bone indicate cumulative radiation-associated  
273 effects on bone properties particularly when using high radiation doses (>2G; <sup>15</sup>). The  
274 radiation effects also depend on animal age <sup>15,34</sup> and ovariectomy (OVX) <sup>7</sup>, with younger and  
275 ovariectomized animals being more susceptible to radiation. So far, only one study assessed  
276 radiation-associated effects of longitudinal *in vivo* micro-CT on bone healing in a uni-cortical  
277 tibia burr-hole defect model, and did not find significant radiation effects on bone properties  
278 <sup>1</sup>. In this study, similar CT settings (45kVp, 133  $\mu$ A, 200 ms integration time, 1000 projections  
279 per 180°) were used; however, due to the smaller dimensions of the defect and resulting  
280 shorter scanning time, the radiation dosage (0.36 Gy) was lower compared to our protocol  
281 (0.64 Gy).

282 In the current study, we assessed the combined imaging-associated impact (anesthesia,  
283 handling, radiation; 1x/week for 6 weeks) on callus formation and remodeling in a  
284 diaphyseal femur defect model in adult female C57BL/6J mice. We did not see any significant  
285 imaging-associated changes in bone volume and turnover in the fracture callus during the  
286 remodeling phase (post-operative week 5 and 6). Furthermore, no significant differences in  
287 callus mineralization between scanned (d0, week1-6) and control animals (d0, week 5+6) in  
288 any of the assessed callus volumes (TOT, DC, DP, FP) were observed. The distribution of the  
289 osseous callus volume into the three sub-volumes was also not significantly different  
290 between groups, indicating similar healing patterns. In addition, when separately assessing

291 the cortical fragments between the inner pins (FC), also no significant differences in any of  
292 the assessed parameters were detected between groups. In respect to clinical healing  
293 outcome, the percentage of unions in animals above the sub-critical defect length was 67%  
294 in both groups. Defects without cortical bridging only showed small cartilage residuals as  
295 visualized by Safranin-O staining, indicating manifestation of non-union formation. In the  
296 defect regions of unions, no cartilage was seen, indicating progression towards the end of  
297 the healing period. As adverse effects of radiation on bone properties have been shown to  
298 be mediated via Sclerostin inhibition of osteoanabolic Wnt-signaling <sup>24</sup>, we also visualized  
299 Sclerostin expression in the fracture callus by immunohistochemistry, but did not see  
300 differences in number of stained osteocytes, staining intensity and pattern between groups  
301 in any of the assessed callus regions.

302 In summary, we did not see significant differences in a total of 7 assessed CT and histological  
303 parameters in the total volume (TOT) between the inner pins of the fixator as well as in the  
304 different callus sub-volumes (DC, DP, FP) and the adjacent cortical fragments (FC) between  
305 the scan and the control group. The sub-volume specific analysis also allowed capturing of  
306 distinct features only present in one region (e.g. significant post-operative increase in bone  
307 resorption in FC), that showed contrary progression compared to the overall picture  
308 (significant post-operative increase in bone formation in DC, DP and FP). This also shows the  
309 importance of VOI selection. The other longitudinal fracture healing studies either assessed a  
310 VOI consisting of the defect as well as adjacent bone fragments, or then only the callus in the  
311 defect region including the last slice of intact cortex <sup>2,3</sup>, or the callus in the defect and  
312 periosteal region combined <sup>21</sup> was evaluated. An overall VOI including the defect region and  
313 cortical fragments can give an overview of callus characteristics, but sub-volume-specific

314 differences might be missed. Therefore, analysis of different endosteal and periosteal callus  
315 regions as well as the adjacent cortical volume is favorable.

316 The longitudinal *in vivo* micro-CT based approach established in this study allows monitoring  
317 of the different healing phases in mouse femur defect models without significant anesthesia-  
318 , handling- and radiation-associated effects on callus properties. By registering consecutive  
319 scans of the defect region for each animal, data on bone turnover can be obtained with  
320 distinct characteristics of the different fracture healing phases. Importantly, repeated  
321 anesthesia, handling and radiation associated with the scans did not impair callus formation  
322 and remodeling. Therefore, this study supports the application of longitudinal *in vivo* micro-  
323 CT for healing-phase specific monitoring of fracture repair in mice. Further studies should  
324 evaluate the potential of this micro-CT-based monitoring approach for healing phase-specific  
325 discrimination of normal and impaired healing conditions.

326

## 327 **Methods**

### 328 **Study design**

329 A micro-CT based approach for longitudinal *in vivo* monitoring of fracture healing was  
330 established for a mouse femur defect model. All mice received a femur defect and post-  
331 operative micro-CT scans (vivaCT 40, ScancoMedical, Brüttisellen, Switzerland) were  
332 performed. The scan group then received weekly scans of the defect area (weeks 1-6). To  
333 assess the combined effect of radiation, anesthesia and handling associated with weekly  
334 micro-CT measurements, controls were only scanned after 5 weeks. Control animals then  
335 received another scan in post-operative week 6 to enable the assessment of both, static and  
336 dynamic bone parameters during the final remodeling phase of fracture healing.

337

## 338 **Animals**

339 All animal procedures were approved by the authorities (licence number: 36/2014;  
340 Kantonales Veterinäramt Zürich, Zurich, Switzerland). We confirm that all methods were  
341 carried out in accordance with relevant guidelines and regulations (ARRIVE guidelines and  
342 Swiss Animal Welfare Act and Ordinance (TSchG, TSchV)). Female 12 week-old C57BL/6J  
343 mice were purchased from Janvier (Saint Berthevin Cedex, France) and housed in the animal  
344 facility of the ETH Phenomics Center (EPIC; 12h:12h light-dark cycle, maintenance feed  
345 (3437, KLIBA NAFAG, Kaiseraugst, Switzerland), 5 animals/cage). At an age of 20 weeks, all  
346 animals received a femur defect by performing an osteotomy (group 1: control group, defect  
347 length -  $1.45\text{mm} \pm 0.16$ , n=8; group 2: scan group, defect length -  $1.47\text{mm} \pm 0.16$ , n=11;  
348 housing after surgery: 2-3 animals/cage). Perioperative analgesia (25 mg/L, Tramal®,  
349 Gruenenthal GmbH, Aachen, Germany) was provided via the drinking water two days before  
350 surgery until the third postoperative day. For surgery and micro-CT scans, animals were  
351 anesthetized with isoflurane (induction/maintenance: 5%/1-2% isoflurane/oxygen).

352

## 353 **Femur osteotomy**

354 An external fixator (Mouse ExFix, RISystem, Davos, Switzerland; stiffness:  $24\text{N/mm}^{35}$ ) was  
355 positioned at the craniolateral aspect of the right femur and attached using four mounting  
356 pins. First, the most distal pin was inserted approximately 2mm proximal to the growth  
357 plate, followed by placement of the most proximal and the inner pins. Subsequently, a femur  
358 defect was created using 2 Gigli wire saws.

359



### 360 **Time-lapsed *in vivo* micro-CT**

361 Immediate post-surgery correct positioning of the fixator and the defect was visualized using  
362 a vivaCT 40 (Scanco Medical AG, Brüttisellen, Switzerland) (isotropic nominal resolution: 10.5  
363  $\mu\text{m}$ ; 2 stacks of 211 slices; 55 kVp, 145  $\mu\text{A}$ , 350 ms integration time, 500 projections per  
364  $180^\circ$ , 21 mm field of view (FOV), scan duration ca. 15 min). Subsequently, the fracture callus  
365 and the adjacent bone between the inner pins of the fixator were scanned weekly using the  
366 same settings. Scans were registered consecutively and morphometric indices (bone volume  
367 - BV, bone volume/total volume – BV/TV, bone formation rate – BFR, bone resorption rate -  
368 BRR) were computed (threshold: 395mg HA/cm<sup>3</sup>; <sup>4,11</sup>). To assess mineralization progression,  
369 a second threshold (645mg HA/cm<sup>3</sup>) was applied and the ratio between highly and lowly  
370 mineralized tissue (BV<sub>645</sub>/BV<sub>395</sub>) was calculated. According to the standard clinical evaluation  
371 of X-rays, the number of bridged cortices per callus was evaluated in two perpendicular  
372 planes (UCT Evaluation V6.5-1, Scanco Medical AG, Brüttisellen, Switzerland). A “healed  
373 fracture” was considered as having a minimum of at least three bridged cortices per callus.  
374 For evaluation, four volumes of interest (VOIs) were defined, which were created  
375 automatically from the post-operative measurement (Fig. 1): defect center (DC), defect  
376 periphery (DP), cortical fragment center (FC), and fragment periphery (FP). Data were  
377 normalised to the central VOIs: DC/DC, DP/DC, FC/FC, FP/FC.

378

### 379 **Histology**

380 Histological analyses were performed in a sub-set of animals (n=6/group). On day 42, femora  
381 were excised, the femoral head was removed and the samples were placed in 4% neutrally  
382 buffered formalin for 24 hours and subsequently decalcified in 12.5% EDTA for 10-14 days.

383 The samples were embedded in paraffin and 4.5  $\mu$ m longitudinal sections were stained with  
384 Safranin-O/Fast Green: Weigert's iron haematoxylin solution (HT1079, Sigma-Aldrich, St.  
385 Louis, MO) - 4min, 1:10 HCl-acidified 70% ethanol - 10s, tap water - 5min, 0.02% Fast Green  
386 (F7258, Sigma-Aldrich, St. Louis, MO) - 3min, 1% acetic acid - 10s, 0.1% Safranin-O (84120,  
387 Fluka, St. Louis, MO) - 5min. Images were taken with Slide Scanner Panoramic 250 (3D  
388 Histech, Budapest, Hungary) at 20x magnification.

389

390 For immunohistochemical staining of Sclerostin, nonspecific sites were blocked (1% BSA/PBS  
391 + 1% rabbit serum) for 60 min at room temperature. Subsequently, the sections were  
392 incubated with the primary antibody against Sclerostin (AF1589, R&D Systems, Minneapolis,  
393 MN; 1:150 in 1%BSA/PBS + 0.2% rabbit serum) overnight at 4°C. To detect the primary  
394 antibody, a secondary biotinylated rabbit anti-goat-IgG antibody (BAF017, R&D Systems,  
395 Minneapolis, MN) was added for 1 h at room temperature. For signal amplification, the  
396 slides were incubated with avidin-biotin complex (PK-6100 Vector Laboratories, Burlingame,  
397 CA) for 30 min. Diaminobenzidine (Metal Enhanced DAB Substrate Kit, 34065 ThermoFisher  
398 Scientific, Waltham, MA) was used as detection substrate. Counterstaining was performed  
399 with FastGreen (F7258, Sigma-Aldrich, St. Louis, MO). Species-specific IgG was used as  
400 isotype control. Images were taken with Slide Scanner Panoramic 250 (3D Histech,  
401 Budapest, Hungary) at 40x magnification.

402

### 403 **Statistics**

404 CT analysis: Data were tested for normal distribution (Shapiro-Wilk-Test) and homogeneity  
405 of variance (Levene-Test). Depending on the test outcome, group comparisons (scan versus

406 control group) of data derived at single time points were performed by two-tailed Student's  
407 t-test or Mann-Whitney U-test (IBM SPSS Statistics Version 23). For statistical evaluation of  
408 repeated measurements (scan group) dependent on results from normality and variance  
409 tests, either one-way analysis of variance (ANOVA) with Bonferroni correction or Friedman  
410 test with Dunn correction for multiple comparisons (GraphPad Prism 7) were performed.  
411 Two-way ANOVA was used for longitudinal comparison of the body weight between the  
412 control and the scan group. The level of significance was set at  $p < 0.05$ .

413

#### 414 **Acknowledgements**

415 The authors gratefully acknowledge support from the EU (BIODESIGN FP7-NMP-2012-  
416 262948 and ERC Advanced MechAGE ERC-2016-ADG-741883). E. Wehrle received funding  
417 from the ETH Postdoctoral Fellowship Program (MSCA-COFUND, FEL-25\_15-1).

418

#### 419 **Author Contributions Statement**

420 The study was designed by E.W., G.A.K., S.H. and R.M.. The experiments were performed  
421 by E.W., G.A.K. and A.C.S.. Data analyses were performed by E.W. and D.C.B.. The  
422 manuscript was written by E.W. and reviewed and approved by all authors.

423

#### 424 **Data availability**

425 All necessary data generated or analyzed during the present study are included in this  
426 published article and its Supplementary Information files (preprint available on BioRxiv  
427 (BIORXIV/2019/692343). Additional information related to this paper may be requested  
428 from the authors.

429 **Competing Interests**

430 The authors declare no competing interests.

431

432 **References**

- 433 1 Taiani, J. T. *et al.* Embryonic stem cell therapy improves bone quality in a model of impaired  
434 fracture healing in the mouse; tracked temporally using in vivo micro-CT. *Bone* **64**, 263-272,  
435 doi:10.1016/j.bone.2014.04.019 (2014).
- 436 2 Locher, R. J. *et al.* Traumatic brain injury and bone healing: radiographic and biomechanical  
437 analyses of bone formation and stability in a combined murine trauma model. *J. Musculoskel.*  
438 *Neuron*. **15**, 309-315 (2015).
- 439 3 Graef, F. *et al.* Impaired fracture healing with high non-union rates remains irreversible after  
440 traumatic brain injury in leptin-deficient mice. *J. Musculoskel. Neuron*. **17**, 78-85 (2017).
- 441 4 Betts, D., Wehrle, E., Kuhn, G. A., Hofmann, S. & Müller, R. Quantification of mechanical  
442 stimuli and bone formation in fracture healing using in vivo time-lapsed imaging. *Tissue Eng.*  
443 *Pt. A* **21**, S56-S56 (2015).
- 444 5 Wehrle, E., Kuhn, G. A., Betts, D. C., Scheuren, A. & Müller, R. Influence of longitudinal in vivo  
445 micro-computed tomography on fracture healing in a femoral defect model. *Tissue Eng. Pt. A*  
446 **21**, S406-S406 (2015).
- 447 6 Boyd, S. K., Davison, P., Müller, R. & Gasser, J. A. Monitoring individual morphological  
448 changes over time in ovariectomized rats by in vivo micro-computed tomography. *Bone* **39**,  
449 854-862, doi:10.1016/j.bone.2006.04.017 (2006).
- 450 7 Klinck, R. J., Campbell, G. M. & Boyd, S. K. Radiation effects on bone architecture in mice and  
451 rats resulting from in vivo micro-computed tomography scanning. *Med. Eng. Phys.* **30**, 888-  
452 895, doi:10.1016/j.medengphy.2007.11.004 (2008).
- 453 8 Lambers, F. M., Kuhn, G., Schulte, F. A., Koch, K. & Müller, R. Longitudinal assessment of in  
454 vivo bone dynamics in a mouse tail model of postmenopausal osteoporosis. *Calcified Tissue*  
455 *Int.* **90**, 108-119, doi:10.1007/s00223-011-9553-6 (2012).
- 456 9 David, V. *et al.* Noninvasive in vivo monitoring of bone architecture alterations in hindlimb-  
457 unloaded female rats using novel three-dimensional microcomputed tomography. *J. Bone*  
458 *Miner. Res.* **18**, 1622-1631, doi:10.1359/jbmr.2003.18.9.1622 (2003).
- 459 10 Lambers, F. M., Schulte, F. A., Kuhn, G., Webster, D. J. & Müller, R. Mouse tail vertebrae  
460 adapt to cyclic mechanical loading by increasing bone formation rate and decreasing bone  
461 resorption rate as shown by time-lapsed in vivo imaging of dynamic bone morphometry.  
462 *Bone* **49**, 1340-1350, doi:10.1016/j.bone.2011.08.035 (2011).
- 463 11 Schulte, F. A., Lambers, F. M., Kuhn, G. & Müller, R. In vivo micro-computed tomography  
464 allows direct three-dimensional quantification of both bone formation and bone resorption  
465 parameters using time-lapsed imaging. *Bone* **48**, 433-442, doi:10.1016/j.bone.2010.10.007  
466 (2011).
- 467 12 Kuhn, G., Weigt, C., Lambers, F. M., Schulte, F. A. & Müller, R. Bisphosphonate treatment  
468 does not impair load adaptation in osteopenic mouse bones. *Bone* **50**, S156-S156,  
469 doi:10.1016/j.bone.2012.02.487 (2012).
- 470 13 Hohlbaum, K. *et al.* Severity classification of repeated isoflurane anesthesia in C57BL/6JRj  
471 mice-Assessing the degree of distress. *Plos One* **12**, doi:ARTN  
472 e017958810.1371/journal.pone.0179588 (2017).

- 473 14 Tremoleda, J. L. *et al.* Imaging technologies for preclinical models of bone and joint disorders.  
474 *Ejnm Res.* **1**, doi:Artn 1110.1186/2191-219x-1-11 (2011).
- 475 15 Laperre, K. *et al.* Development of micro-CT protocols for in vivo follow-up of mouse bone  
476 architecture without major radiation side effects. *Bone* **49**, 613-622,  
477 doi:10.1016/j.bone.2011.06.031 (2011).
- 478 16 Hildebrandt, I. J., Su, H. & Weber, W. A. Anesthesia and other considerations for in vivo  
479 imaging of small animals. *ILAR J.* **49**, 17-26 (2008).
- 480 17 Dudziak, M. E. *et al.* The effects of ionizing radiation on osteoblast-like cells in vitro. *Plast.*  
481 *Reconstr. Surg.* **106**, 1049-1061 (2000).
- 482 18 Matsumura, S., Jikko, A., Hiranuma, H., Deguchi, A. & Fuchihata, H. Effect of X-ray irradiation  
483 on proliferation and differentiation of osteoblast. *Calcified Tissue Int.* **59**, 307-308 (1996).
- 484 19 Scheven, B. A. A., Burger, E. H., Kawilarangdehaas, E. W. M., Wassenaar, A. M. & Nijweide, P.  
485 J. Effects of ionizing irradiation on formation and resorbing activity of osteoclasts in vitro.  
486 *Lab. Invest.* **53**, 72-79 (1985).
- 487 20 Brouwers, J. E. M., Van Rietbergen, B. & Huiskes, R. No effects of in vivo micro-CT radiation  
488 on structural parameters and bone marrow cells in proximal tibia of Wistar rats detected  
489 after eight weekly scans. *J. Orthop. Res.* **25**, 1325-1332, doi:10.1002/jor.20439 (2007).
- 490 21 Mehta, M., Checa, S., Lienau, J., Hutmacher, D. & Duda, G. N. In vivo tracking of segmental  
491 bone defect healing reveals that callus patterning is related to early mechanical stimuli. *Eur.*  
492 *Cells Mater.* **24**, 358-371; discussion 371 (2012).
- 493 22 Tsitsilonis, S. *et al.* The effect of traumatic brain injury on bone healing: an experimental  
494 study in a novel in vivo animal model. *Injury* **46**, 661-665, doi:10.1016/j.injury.2015.01.044  
495 (2015).
- 496 23 Wang, A. Y. *et al.* Effect of cervus and cucumis peptides on osteoblast activity and fracture  
497 healing in osteoporotic bone. *Evid. Based Compl. Alt.* **2014**, 958908,  
498 doi:10.1155/2014/958908 (2014).
- 499 24 Chandra, A. *et al.* Suppression of sclerostin alleviates radiation-induced bone loss by  
500 protecting bone-forming cells and their progenitors through distinct mechanisms. *J. Bone*  
501 *Miner. Res.* **32**, 360-372, doi:10.1002/jbmr.2996 (2017).
- 502 25 Zwingenberger, S. *et al.* Establishment of a femoral critical-size bone defect model in  
503 immunodeficient mice. *J. Surg. Res.* **181**, e7-e14, doi:10.1016/j.jss.2012.06.039 (2013).
- 504 26 Russel, W. M. S. & Burch, R. L. *The Principles of Humane Experimental Technique* (1959).
- 505 27 Tannenbaum, J. & Bennett, B. T. Russell and Burch's 3Rs Then and Now: The Need for Clarity  
506 in Definition and Purpose. *J. Am. Assoc. Lab. Anim.* **54**, 120-132 (2015).
- 507 28 Stevens, W. C. *et al.* Comparative toxicities of halothane, isoflurane, and diethyl-ether at  
508 subanesthetic concentrations in laboratory-animals. *Anesthesiology* **42**, 408-419, doi:Doi  
509 10.1097/00000542-197504000-00008 (1975).
- 510 29 Stollings, L. M. *et al.* Immune modulation by volatile anesthetics. *Anesthesiology* **125**, 399-  
511 411, doi:10.1097/Aln.0000000000001195 (2016).
- 512 30 Kim, H. *et al.* Oxidative damages in the DNA, lipids, and proteins of rats exposed to  
513 isofluranes and alcohols. *Toxicology* **220**, 169-178, doi:10.1016/j.tox.2005.12.010 (2006).
- 514 31 Kadar, B. *et al.* Effects of isoflurane exposure on oncogene and tumour suppressor gene  
515 expressions in vital organs of CBA/CA mice. *In Vivo* **21**, 861-865 (2007).
- 516 32 Li, Z. H., Kuhn, G., Schirmer, M., Müller, R. & Ruffoni, D. Impaired bone formation in  
517 ovariectomized mice reduces implant integration as indicated by longitudinal in vivo micro-  
518 computed tomography. *Plos One* **12**, doi:ARTN e018483510.1371/journal.pone.0184835  
519 (2017).
- 520 33 Lambers, F. M. *et al.* Bone adaptation to cyclic loading in murine caudal vertebrae is  
521 maintained with age and directly correlated to the local micromechanical environment. *J.*  
522 *Biomech.* **48**, 1179-1187, doi:10.1016/j.jbiomech.2014.11.020 (2015).

523 34 Willie, B. M. *et al.* Diminished response to in vivo mechanical loading in trabecular and not  
524 cortical bone in adulthood of female C57Bl/6 mice coincides with a reduction in deformation  
525 to load. *Bone* **55**, 335-346, doi:10.1016/j.bone.2013.04.023 (2013).  
526 35 Paul, G. R., Cherbuin, M., Wehrle, E. & Müller, R. Minimising external fixator stiffness  
527 variation via computational analysis. *Annual Meeting, Swiss Soc. Biomed. Eng*, 45 (2017).

528

## 529 **Figure Legends**

530 **Figure 1.** Volumes of interest (VOIs) for micro-CT evaluation of callus and adjacent bone:  
531 Defect center (DC - red), defect periphery (DP - yellow), fragment center (FC - blue),  
532 fragment periphery (FP - orange).

533

534 **Figure 2.** Representative images (full image and cut; threshold: 645 mg HA/cm<sup>3</sup>) of the  
535 defect region from animals of the scan group (week 0-6): union defect (top panel), non-  
536 union defect (bottom panel). Visualization of bone formation (orange) and resorption (blue)  
537 via registration of micro-CT scans from week 5 and 6.

538

539 **Figure 3.** Micro-CT based evaluation of bone parameters in the scan group using different  
540 VOIS: total VOI (TOT) - defect and adjacent bone fragments (top), defect VOI (DC+DP) –  
541 defect center and periphery (bottom). a+d. Bone formation rate (solid) and bone resorption  
542 rate (dashed line) in the femur defect (TV) given in percent per day. b+e: Bone volume (BV)  
543 normalized to TV (DC+FC for TOT and DC for DC+DP). c+f: Degree of bone mineralization  
544 given as ratio of bone volume with a density  $\geq 645$  mg HA/cm<sup>3</sup> to the total osseous volume in  
545 the defect (threshold  $\geq 395$  mg HA/cm<sup>3</sup>). n=10; \* indicates  $p < 0.05$  between consecutive  
546 weeks determined by Friedman test with Dunn correction for multiple comparisons (a-e)/  
547 repeated measurements ANOVA with Bonferroni correction (f).

548

549 **Figure 4.** Micro-CT based evaluation of bone parameters in the scan (red) and control group  
550 (blue) using different VOIS: total VOI (TOT) - defect and adjacent bone fragments (top),  
551 defect VOI (DC+DP) – defect center and periphery (bottom). a+d. Formed (solid) and  
552 resorbed (empty) bone volume (BV) in the femur defect (TV) given in percent per day. b+e:  
553 Bone volume (BV) normalized to TV (DC+FC for TOT and DC for DC+DP). c+f: Degree of bone  
554 mineralization given as ratio of bone volume with a density  $\geq 645$  mg HA/cm<sup>3</sup> to the total  
555 osseous volume in the defect (threshold  $\geq 395$  mg HA/cm<sup>3</sup>). Control group: n=8, scan group:  
556 n=10. \* indicates  $p < 0.05$  determined by two-tailed Student's t-test (a-e; f: week 6)/Mann-  
557 Whitney U-test (f: week 5).

558

559 **Figure 5.** Representative longitudinal sections of fractured femora 6 weeks after defect  
560 surgery of unions and non-unions in the scan and control group. Top panel: Safranin-O  
561 staining - overview images, scale bar = 2 mm; mid panel: Safranin-O staining – area between  
562 inner pins of fixator, scale bar = 500  $\mu$ m; bottom panel: Sclerostin staining – area centered  
563 between inner pins of fixator, scale bar = 100  $\mu$ m.

564

565 **Tables**

566 **Table 1.** Micro-CT based evaluation of bone parameters in the scan group using different VOIS

|             | Post-operative week |              |             |             |             |             |          | p-value #                                |        | Post-operative week |         |         |         |         |         |          | p-value # |  |
|-------------|---------------------|--------------|-------------|-------------|-------------|-------------|----------|------------------------------------------|--------|---------------------|---------|---------|---------|---------|---------|----------|-----------|--|
|             | 0-1                 | 1-2          | 2-3         | 3-4         | 4-5         | 5-6         | 0        |                                          |        | 1                   | 2       | 3       | 4       | 5       | 6       |          |           |  |
| <b>DC</b>   |                     |              |             |             |             |             |          |                                          |        |                     |         |         |         |         |         |          |           |  |
| BFR [%/day] | 0.23 ± 0.10*        | 2.24 ± 1.20  | 2.40 ± 1.15 | 1.30 ± 0.49 | 0.63 ± 0.14 | 0.41 ± 0.09 | < 0.0001 | BV/TV [%]                                | 1 ± 0  | 3 ± 1               | 17 ± 9* | 28 ± 15 | 30 ± 14 | 29 ± 12 | 28 ± 10 | < 0.0001 |           |  |
| BRR [%/day] | 0.06 ± 0.02         | 0.14 ± 0.04* | 0.88 ± 0.36 | 1.06 ± 0.85 | 0.75 ± 0.43 | 0.52 ± 0.25 | < 0.0001 | BV <sub>645</sub> /BV <sub>395</sub> [%] | 1 ± 1  | 34 ± 10             | 26 ± 6  | 49 ± 7  | 67 ± 6  | 76 ± 6  | 80 ± 6  | < 0.0001 |           |  |
| <b>DP</b>   |                     |              |             |             |             |             |          |                                          |        |                     |         |         |         |         |         |          |           |  |
| BFR [%/day] | 0.03 ± 0.02*        | 0.38 ± 0.16  | 1.07 ± 0.88 | 0.68 ± 0.52 | 0.28 ± 0.20 | 0.18 ± 0.11 | < 0.0001 | BV/TV [%]                                | 0 ± 0  | 0 ± 0               | 3 ± 1   | 9 ± 7   | 11 ± 9  | 11 ± 9  | 11 ± 8  | < 0.0001 |           |  |
| BRR [%/day] | 0.01 ± 0.0          | 0.03 ± 0.02  | 0.19 ± 0.08 | 0.34 ± 0.31 | 0.30 ± 0.23 | 0.18 ± 0.16 | < 0.0001 | BV <sub>645</sub> /BV <sub>395</sub> [%] | 2 ± 3  | 24 ± 11             | 8 ± 2   | 37 ± 9  | 61 ± 10 | 71 ± 7  | 74 ± 9  | < 0.0001 |           |  |
| <b>FC</b>   |                     |              |             |             |             |             |          |                                          |        |                     |         |         |         |         |         |          |           |  |
| BFR [%/day] | 0.22 ± 0.08         | 0.26 ± 0.15  | 0.31 ± 0.12 | 0.44 ± 0.19 | 0.45 ± 0.11 | 0.40 ± 0.12 | 0.0019   | BV/TV [%]                                | 57 ± 7 | 57 ± 6              | 53 ± 6  | 48 ± 5  | 44 ± 5  | 41 ± 6  | 40 ± 7  | < 0.0001 |           |  |
| BRR [%/day] | 0.24 ± 0.17*        | 0.78 ± 0.31  | 1.13 ± 0.30 | 1.01 ± 0.30 | 0.80 ± 0.25 | 0.60 ± 0.21 | < 0.0001 | BV <sub>645</sub> /BV <sub>395</sub> [%] | 95 ± 1 | 92 ± 1              | 89 ± 2  | 87 ± 1  | 86 ± 2  | 86 ± 2  | 86 ± 3  | < 0.0001 |           |  |
| <b>FP</b>   |                     |              |             |             |             |             |          |                                          |        |                     |         |         |         |         |         |          |           |  |
| BFR [%/day] | 0.43 ± 0.09*        | 1.81 ± 0.58  | 1.77 ± 0.76 | 0.85 ± 0.41 | 0.51 ± 0.28 | 0.33 ± 0.20 | < 0.0001 | BV/TV [%]                                | 5 ± 1  | 6 ± 1               | 16 ± 4  | 21 ± 7  | 20 ± 8  | 20 ± 9  | 20 ± 9  | < 0.0001 |           |  |
| BRR [%/day] | 0.20 ± 0.09         | 0.40 ± 0.13* | 1.16 ± 0.30 | 0.90 ± 0.38 | 0.57 ± 0.22 | 0.35 ± 0.14 | < 0.0001 | BV <sub>645</sub> /BV <sub>395</sub> [%] | 0 ± 0  | 34 ± 9              | 23 ± 7  | 52 ± 7  | 69 ± 5  | 75 ± 4  | 78 ± 3  | < 0.0001 |           |  |

567 DC = defect center, DP = defect periphery, FC = cortical fragment center, FP = cortical fragment periphery; BFR – bone formation rate; BRR – bone resorption rate; BV/TV - bone  
 568 volume normalized to DC for DC, DP and FC for FC, FP; BV<sub>645</sub>/BV<sub>395</sub> - degree of bone mineralization given as ratio of bone volume with a density  $\geq 645$  mg HA/cm<sup>3</sup> to the total  
 569 osseous volume (threshold: 395mg HA/cm<sup>3</sup>); \*, significant difference compared to subsequent week (p < 0.05); #, p-value over time as tested with repeated measurements  
 570 ANOVA with Bonferroni correction/Friedman test with Dunn correction for multiple comparisons, n=10



571 **Table 2.** CT evaluation of bone parameters in the different volumes of interest (VOI) for the  
 572 scan and control group

| VOI | Parameter                                | Evaluation time point/period | Control group | Scan group  |
|-----|------------------------------------------|------------------------------|---------------|-------------|
| DC  | BFR [%/day]                              | week 5-6                     | 0.59 ± 0.24   | 0.41 ± 0.09 |
|     | BRR [%/day]                              | week 5-6                     | 0.62 ± 0.28   | 0.52 ± 0.25 |
|     | BV/TV [%]                                | week 5                       | 35 ± 11       | 29 ± 12     |
|     |                                          | week 6                       | 35 ± 11       | 28 ± 10     |
|     | BV <sub>645</sub> /BV <sub>395</sub> [%] | week 5                       | 76 ± 2        | 76 ± 6      |
|     |                                          | week 6                       | 80 ± 3        | 80 ± 6      |
| DP  | BFR [%/day]                              | week 5-6                     | 0.18 ± 0.12   | 0.18 ± 0.11 |
|     | BRR [%/day]                              | week 5-6                     | 0.15 ± 0.11   | 0.18 ± 0.16 |
|     | BV/TV [%]                                | week 5                       | 11 ± 8        | 11 ± 9      |
|     |                                          | week 6                       | 11 ± 8        | 11 ± 8      |
|     | BV <sub>645</sub> /BV <sub>395</sub> [%] | week 5                       | 71 ± 7        | 71 ± 7      |
|     |                                          | week 6                       | 75 ± 6        | 74 ± 9      |
| FC  | BFR [%/day]                              | week 5-6                     | 0.44 ± 0.19   | 0.40 ± 0.12 |
|     | BRR [%/day]                              | week 5-6                     | 0.63 ± 0.19   | 0.60 ± 0.21 |
|     | BV/TV [%]                                | week 5                       | 42 ± 6        | 41 ± 6      |
|     |                                          | week 6                       | 41 ± 6        | 40 ± 7      |
|     | BV <sub>645</sub> /BV <sub>395</sub> [%] | week 5                       | 84 ± 3        | 86 ± 2      |
|     |                                          | week 6                       | 84 ± 3        | 86 ± 3      |
| FP  | BFR [%/day]                              | week 5-6                     | 0.32 ± 0.09   | 0.33 ± 0.20 |
|     | BRR [%/day]                              | week 5-6                     | 0.30 ± 0.09   | 0.35 ± 0.14 |
|     | BV/TV [%]                                | week 5                       | 21 ± 8        | 20 ± 9      |
|     |                                          | week 6                       | 21 ± 8        | 20 ± 9      |
|     | BV <sub>645</sub> /BV <sub>395</sub> [%] | week 5                       | 76 ± 5        | 75 ± 4      |
|     |                                          | week 6                       | 79 ± 4        | 78 ± 3      |

573 DC - defect center; DP - defect periphery; FC – fragment center; FP – fragment periphery; BFR – bone  
 574 formation rate; BRR – bone resorption rate; BV/TV - bone volume normalized to DC for DC, DP and FC  
 575 for FC, FP. BV<sub>645</sub>/BV<sub>395</sub> - degree of bone mineralization given as ratio of bone volume with a density  
 576 ≥645 mg HA/cm<sup>3</sup> to the total osseous volume (threshold: 395mg HA/cm<sup>3</sup>). Control/scan group -  
 577 n=8/10; \*, significant difference compared to control group, p < 0.05, assessed by two-tailed  
 578 Student's t-test or Mann-Whitney U-test.

579 **Table 3.** Number of bridged cortices per callus evaluated in two perpendicular planes and  
580 number of mice with successful fracture healing ( $\geq 3$  bridged cortices) evaluated 5 and 6  
581 weeks after the defect surgery.

| Group                 | Number of bridged cortices |   |   |   |   | Fracture healing outcome |        |
|-----------------------|----------------------------|---|---|---|---|--------------------------|--------|
|                       | 0                          | 1 | 2 | 3 | 4 | Not healed               | Healed |
| Scan                  |                            |   |   |   |   |                          |        |
| all animals           | 3                          | 0 | 1 | 0 | 7 | 4                        | 7      |
| defects $\geq 1.5$ mm | 3                          | 0 | 1 | 0 | 2 | 4                        | 2      |
| Control               |                            |   |   |   |   |                          |        |
| all animals           | 2                          | 0 | 0 | 0 | 6 | 2                        | 6      |
| defects $\geq 1.5$ mm | 2                          | 0 | 0 | 0 | 1 | 2                        | 1      |

582

**Figure 1**

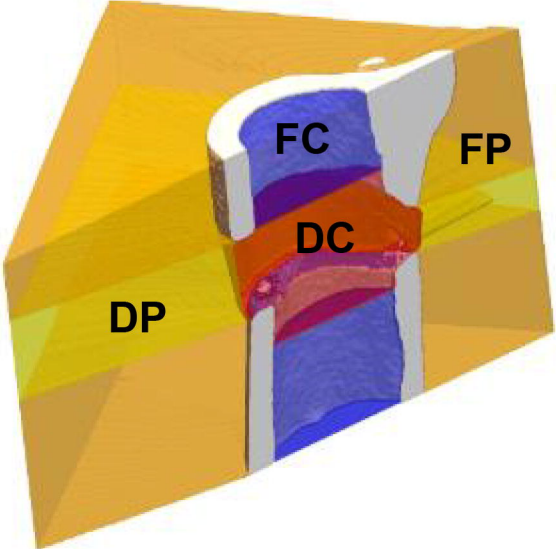

Figure 2

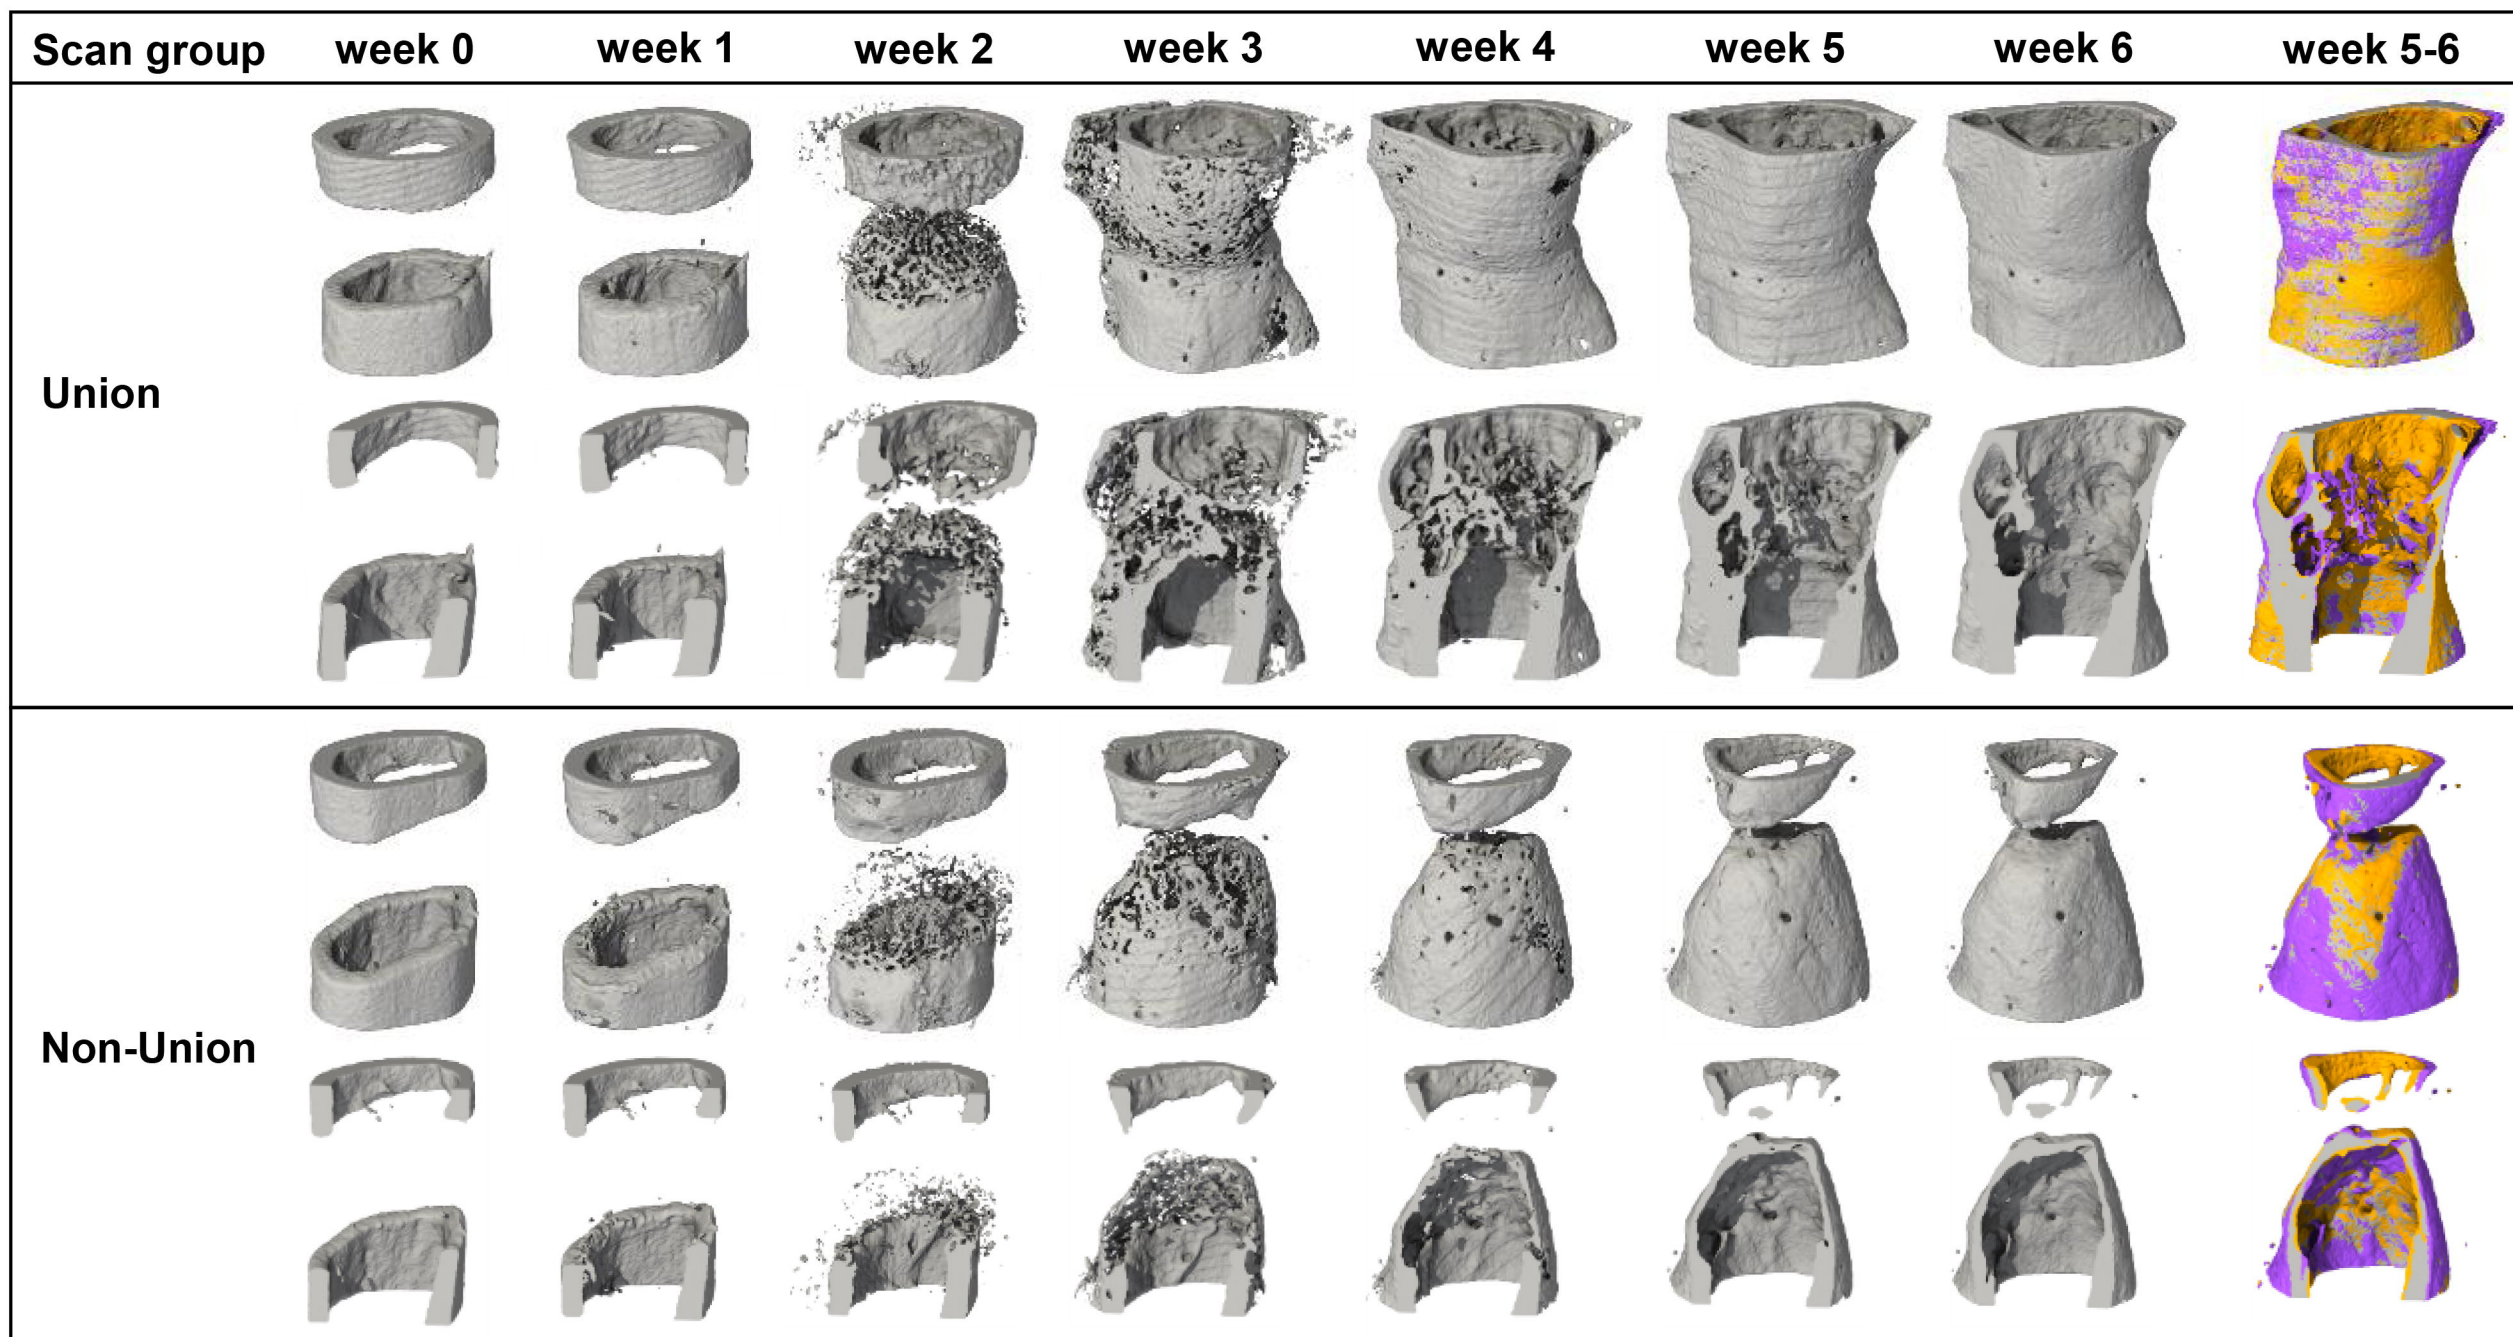

**Figure 3**

**TOT**

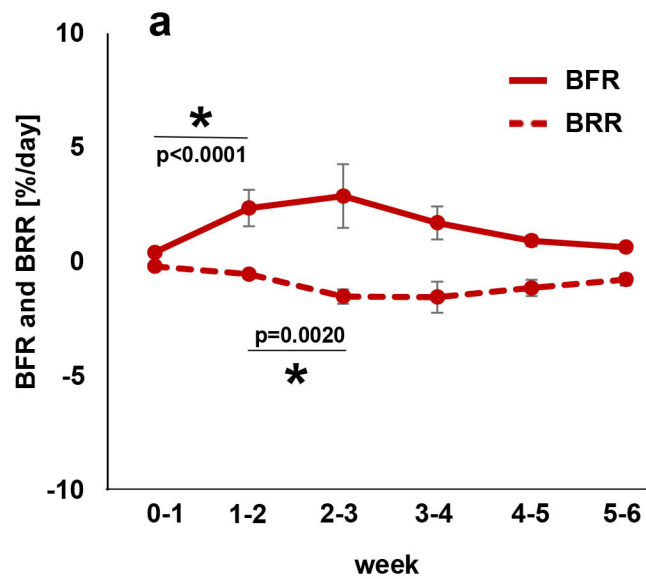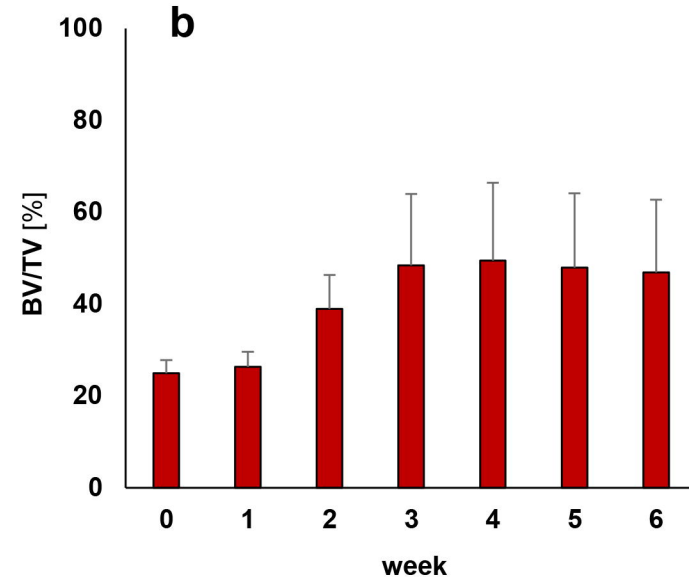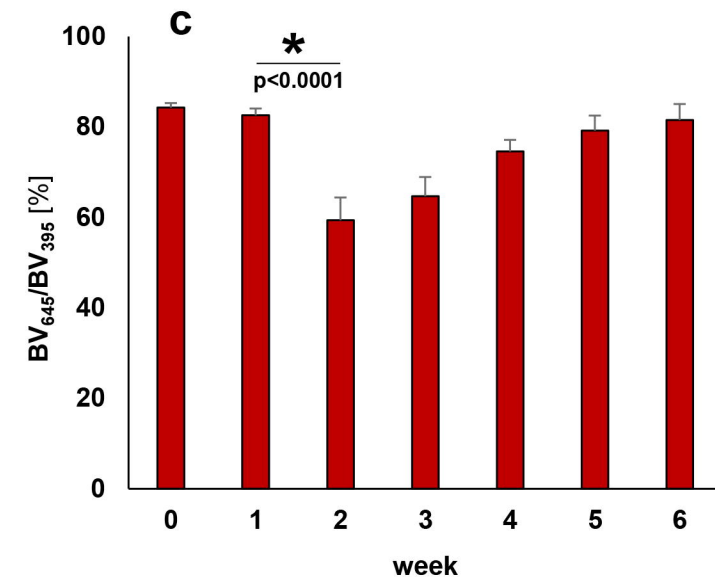

**DC + DP**

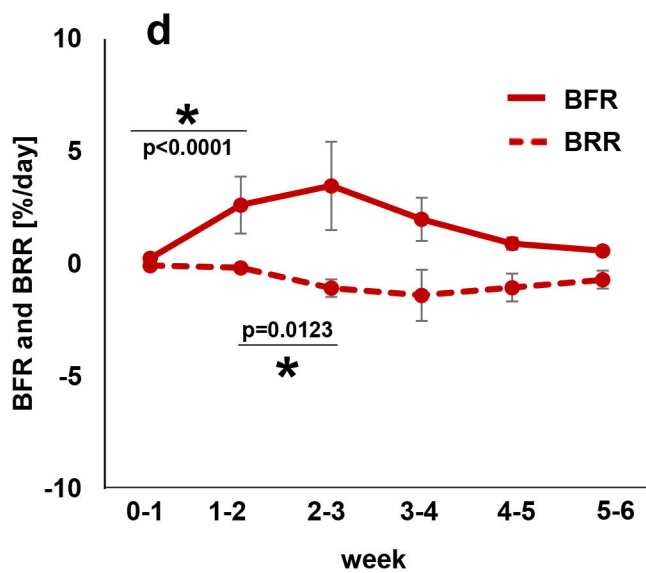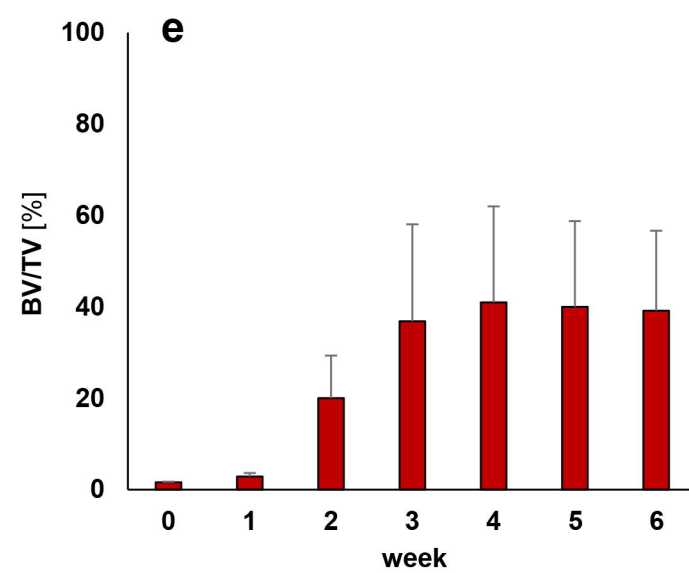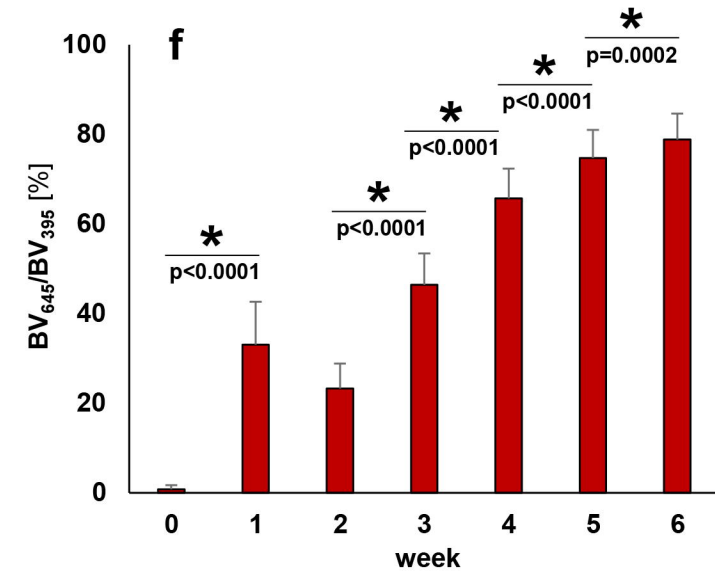

**Figure 4**

**TOT**

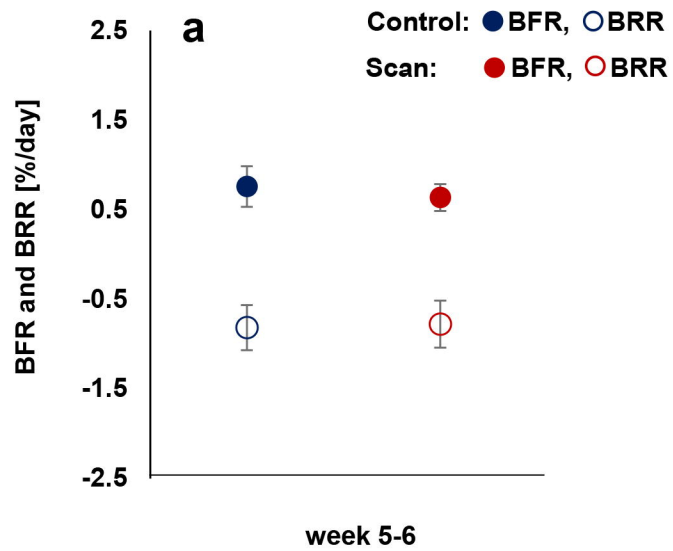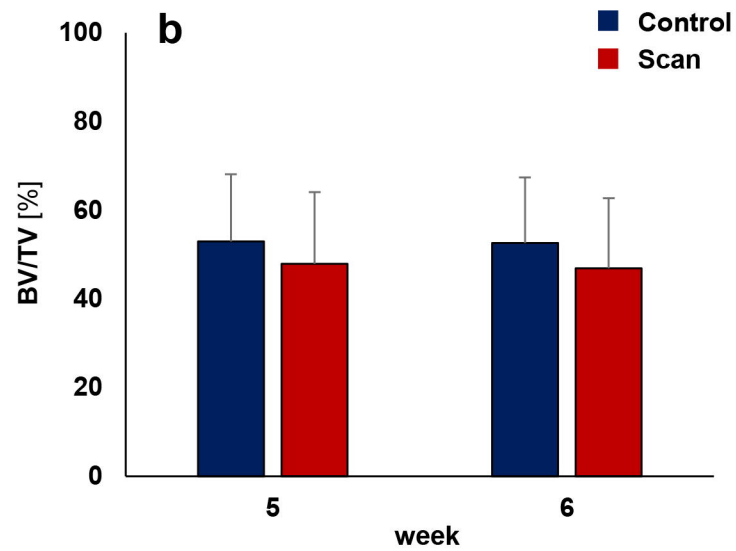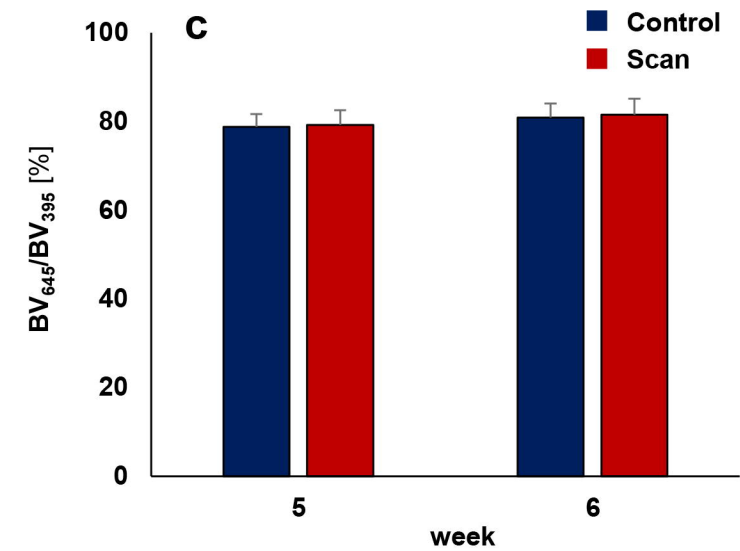

**DC + DP**

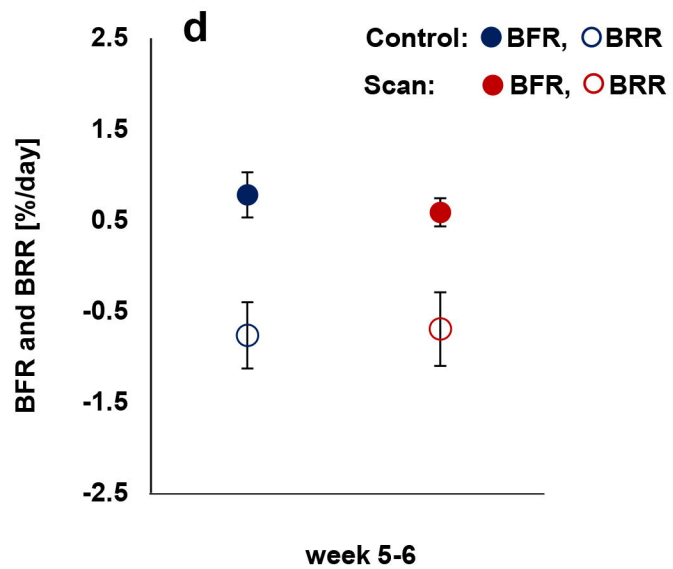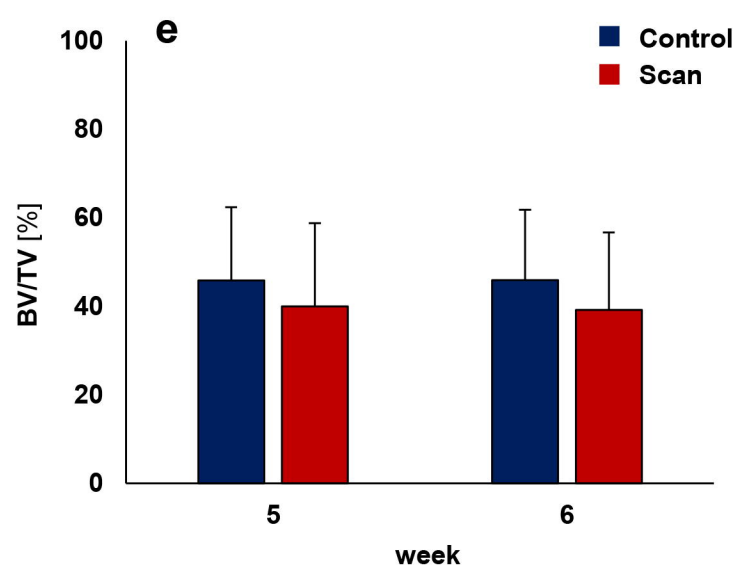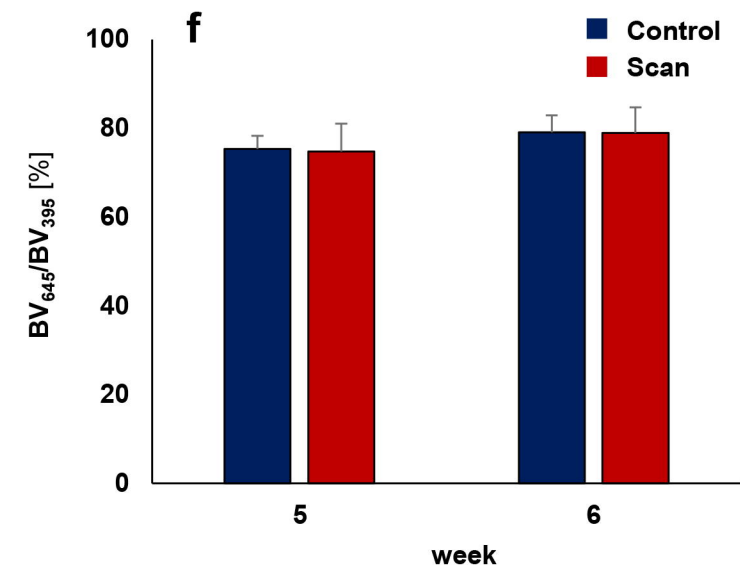

**Figure 5**

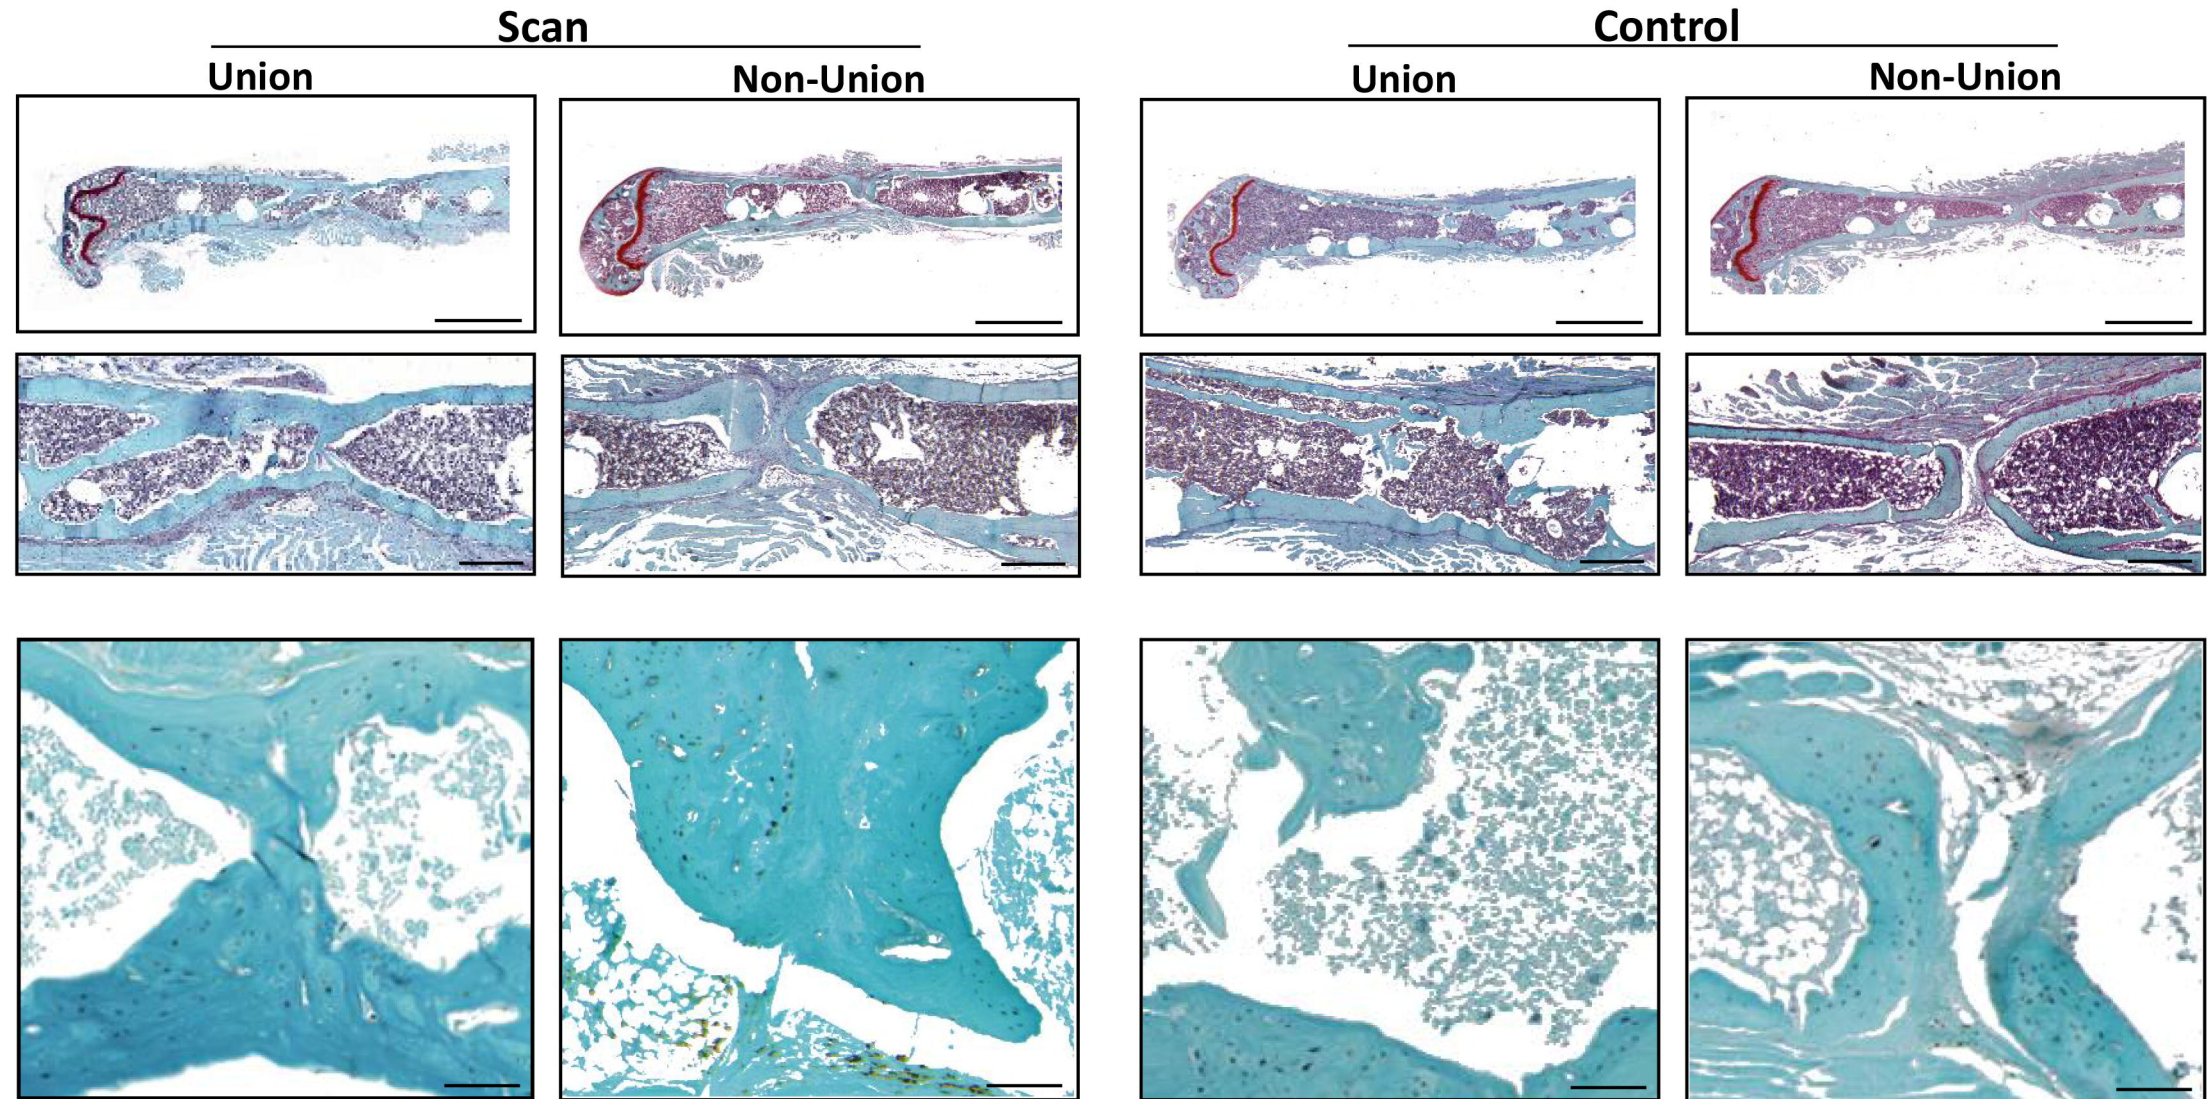

Source: https://www.biorxiv.org/content/10.1101/692343v2.full.pdf
